# Supplementary material
Source: PubMed Central journal article supplement (PMC545826)
Supplement: pnas_102_4_1035__1.pdf [file pnas_102_4_1035__1.pdf]

### 160 bp duplex

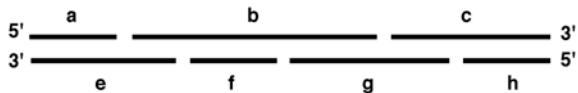

### 80<sub>/PEG9/</sub>80

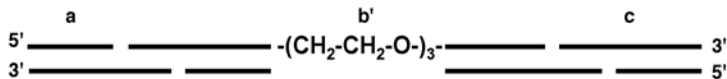

a: 5' GACCTGTTAGCTGACTTGCATTGCACTCCATTAGACTTGCCTCATTACTA 3'

b: 5' GCTATCAAGTGCCAGTAGCATGTCCTTCGGCATATCACCTCACTCGTCAATCATTACTC 3'

b': 5' GCTATCAAGTGCCAGTAGCATGTCCTTCG-(CH<sub>2</sub>-CH<sub>2</sub>-O)<sub>3</sub>-GCATATCACCTCACTCGTCAATCATTACTC 3'

c: 5' CGATAGTTGGAATCTGAACGTAATGATTGACGAGTGAGGTGAGATGC 3'

d: 5' TGGAGTGCAATGCAAGTCAGCTAACAGGTC 3'

e: 5' CGAAGGACATGCTACTGGGCACTTGATAGCTAGTAATGAGGCAAGTCTAA 3'

f: 5' CGATAGTTGGAATCTGAACGGAGTAATGATTGACGAGTGAGGTGAGATGC 3'

g: 5' CTGGACAATCGACTGAACGTAACGTGACGT 3'
