# Supplementary material
Source: PubMed Central journal article supplement (PMC545826)

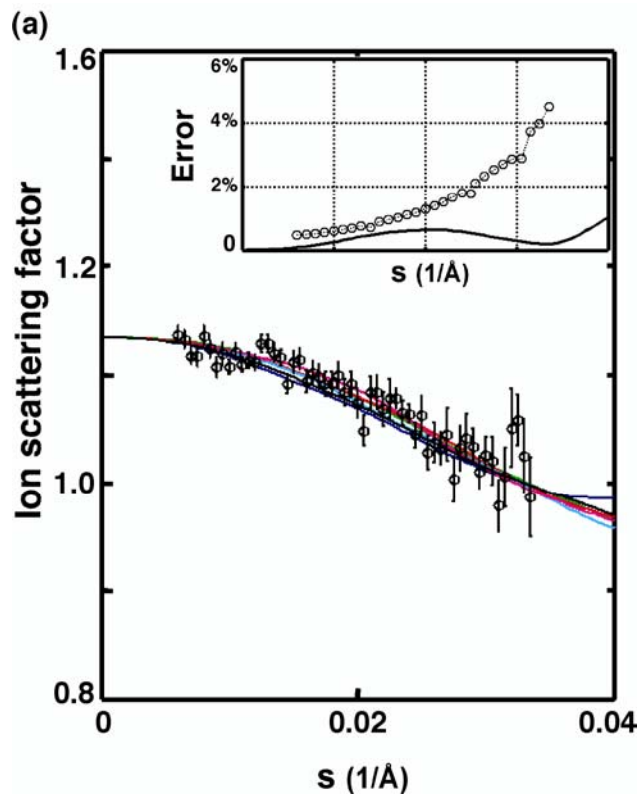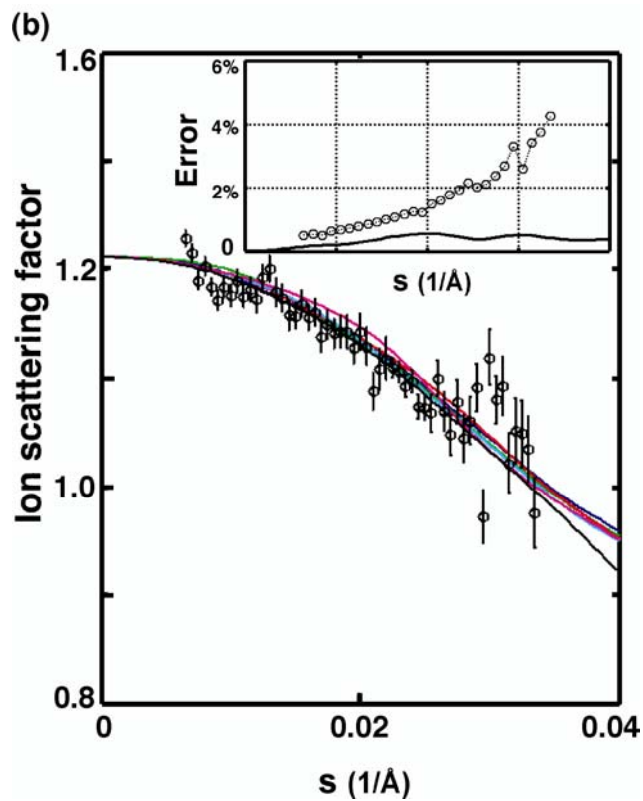

Supplement: pnas_102_4_1035__2.pdf [file pnas_102_4_1035__2.pdf]

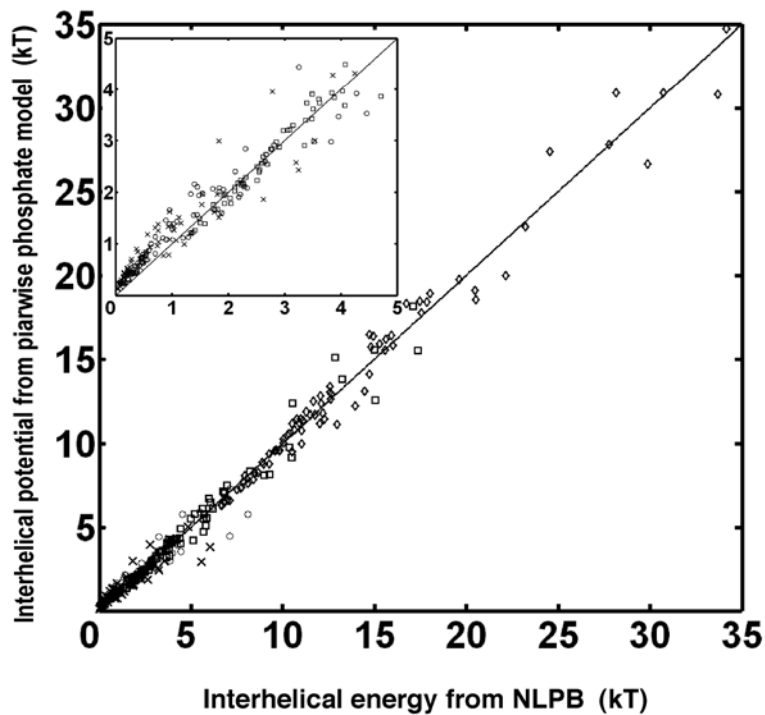

Supplement: pnas_102_4_1035__3.pdf [file pnas_102_4_1035__3.pdf]

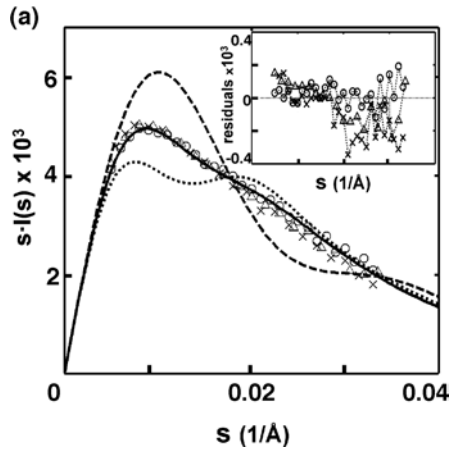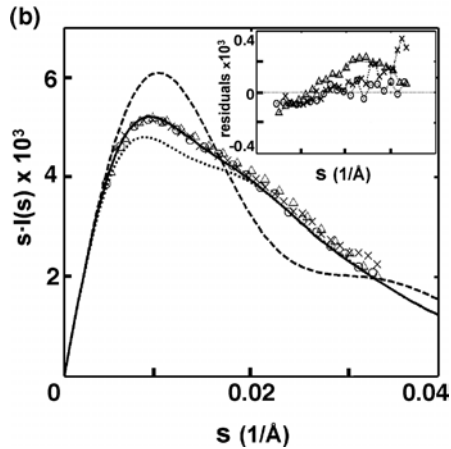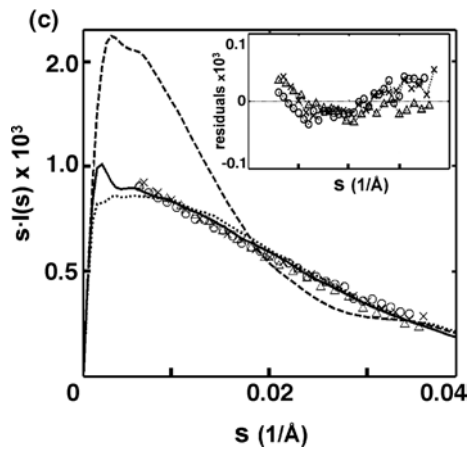

Supplement: pnas_102_4_1035__5.pdf [file pnas_102_4_1035__5.pdf]
